# Supplementary material
Source: PubMed Central journal article supplement (PMC3791682)

A

Murine *p16<sup>Ink4a</sup>* promoter

-316 TGACCAGGCA TGGGGGAGGG GTGTTAGCGT GGGTAGCAGG CGGGGGCTGT CCGATCCTTT  
 -256 AGCGCTGTTT CAACGCCAG CTCTCCTCT GAACCTGCA TCTCTTCTGT AGTCCGGGCT  
 DMP1/ Ets/ Elk-1  
 -196 CCATCCCTTT CCCCTCCCC ATCCGGAGGT GGGGGGAACA GCAGTGTTT CAGGGGTGTT  
 -136 CAATTCATGC TATATTCAGG GCAAATAGCG CCACTATGG CGGGCTGTGG AGCCAGGTCA  
 -76 GGAGCAGAGT GTGGTCTCCC CCCCCCCCCA CACCATCTC AGAGGAAGGA AGGAGGGACC  
 -16 CACTGGTCAC ACGACTGGGC GATTGGGCGG GCACTGAATC

B

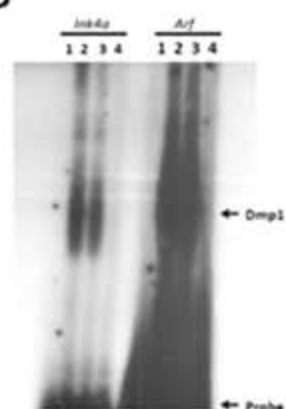

C

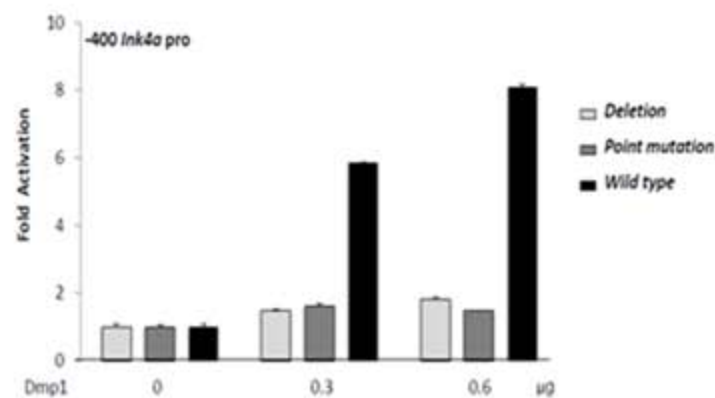

D

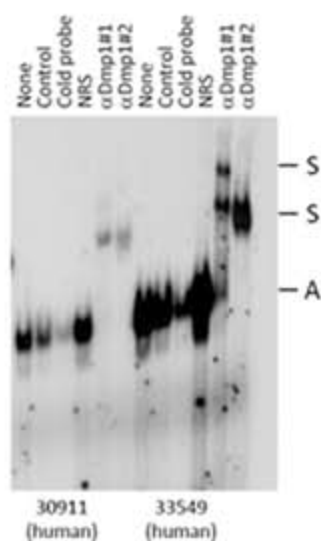

E

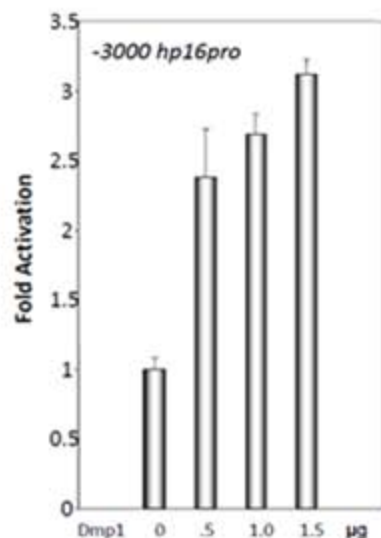

Supplement: mmc1.pdf [file mmc1.pdf]
